# Supplementary material
Source: publisher site journal article supplement (http://static.cambridge.org/content/id/urn:cambridge.org:id:article:S0924270820000204/resource/name/S0924270820000204supp001.docx)
Supplement: Supplementary file 1 [file S0924270820000204supp001.docx]

**Supplementary table 1**: Group results in tests in the four experiments, mean ± SEM

| **Test/Experiment** | **Exp. 1 ICR** | **Exp. 2 ICR** | | **Exp. 3 ICR** | | **Exp. 4 BS** | |
| --- | --- | --- | --- | --- | --- | --- | --- |
| **Sex** | **M** | **F** | **M** | **F** | **M** | **F** | **M** |
| **Distance in open field (cm)** | 24047±651 | 13073±327 | 14128±431 | 12848±626 | 15167±549 | 9455±282 | 9727±423 |
| **Center time in open field (sec)** | 103±6 | *** | *** | *** | *** | 117±15 | 109±14 |
| **Elevated plus-maze open/closed time ratio** | 0.76±0.05 | 0.32±0.04 | 0.42±0.04 | 0.64±0.08 | 0.8±0.13 | 0.55±0.07 | 0.57±0.07 |
| **Elevated plus-maze open/closed entries ratio** | 1.1±0.03 | 0.65±0.04 | 0.78±0.08 | 0.9±0.09 | 1.1±0.1 | 0.48±0.08 | 0.39±0.04 |
| **Elevated plus-maze distance (cm)** | 5236±137 | *** | *** | *** | *** | *** | *** |
| **Forced swim test – immobility (sec)** | 143±6 | 68±8 | 52±11 | 125±13 | 103±12 | 2±0.7 | 15±0.6 |
| **Tail suspension test – immobility (sec)** | 142±6 | *** | *** | *** | *** | *** | *** |
| **Defensive marble burying test (# buried)** | *** | 7.8±1.2 | 6.6±1.1 | 6.5±1.2 | 5±1.1 | *** | *** |
| **Sweet solution preference test** | *** | 0.84±0.04 | 0.86±0.02 | 0.8±0.08 | 0.87±0.01 | *** | *** |
| **Novelty-induced hypophagia (latency to eat, sec)** | *** | 75±12 | 85±11 | 71±12 | 85±14 | *** | *** |
| **Amphetamine (before)** | *** | 10340±603 | 11102±849 | 13633±647 | 13578±537 | *** | *** |
| **Amphetamine-induced hyperactivity** | *** | 14145±979 | 14335±1249 | 17690±1092 | 17191±1267 | *** | *** |
